# Supplementary material
Source: publisher figshare collection journal article supplement (https://diabetesjournals.figshare.com/articles/dataset/_/13623029)
Supplement: Supplementary file 1 [file 1]

## **The CARNATION Study Group**

Xueying Zheng MD<sup>1</sup>; Daizhi Yang MD<sup>2</sup>; Sihui Luo MD<sup>1</sup>; Jinhua Yan PhD<sup>2</sup>; Huixia Yang MD<sup>3</sup>; Xiaohui Guo MD<sup>4</sup>; Fang Liu MD<sup>5</sup>; Xingwu Ran MD<sup>6</sup>; Xinhua Xiao MD<sup>7</sup>; Dalong Zhu MD<sup>8</sup>; Ji Hu MD<sup>9</sup>; Zhiguang Zhou MD<sup>10</sup>; Tao Yang MD<sup>11</sup>; Jiajun Zhao MD<sup>12</sup>; Qin Huang MD<sup>13</sup>; Hongyu Kuang MD<sup>14</sup>; Zhen Liang MD<sup>15</sup>; Guijun Qin MD<sup>16</sup>; Danqing Chen MD<sup>17</sup>; Shandong Ye MD<sup>1</sup>; Yan Wu MD<sup>18</sup>; Jianmin Niu MD<sup>19</sup>; Tianrong Pan MD<sup>20</sup>; Qiu Zhang MD<sup>21</sup>; Yunfeng Shen MD<sup>22</sup>; Minxiang Lei MD<sup>23</sup>; Yan Zhang MD<sup>22</sup>; Bin Yao MD<sup>2</sup>; Wei Bao PhD<sup>24</sup>; Leif Groop PhD<sup>25</sup>; Anne Dornhorst FRCP<sup>26</sup>; Jianping Weng PhD<sup>1,2</sup>

- <sup>1</sup> Department of Endocrinology. The First Affiliated Hospital of USTC, Division of Life Sciences and Medicine, University of Science and Technology of China, Hefei, China.
- <sup>2</sup> Department of Endocrinology and Metabolism. The Third Affiliated Hospital of Sun Yat-sen University, Guangzhou, China.
- <sup>3</sup> Department of Obstetrics and Gynecology. Peking University First Hospital, Beijing, China.
- <sup>4</sup> Department of Endocrinology and Metabolism. Peking University First Hospital, Beijing, China.
- <sup>5</sup> Department of Endocrinology and Metabolism. Shanghai Jiao Tong University Affiliated Sixth People's Hospital, Shanghai, China.
- <sup>6</sup> Department of Endocrinology and Metabolism. West China Hospital, Chengdu, China.
- <sup>7</sup> Department of Endocrinology and Metabolism. Peking Union Medical College Hospital, Beijing, China.
- <sup>8</sup> Department of Endocrinology and Metabolism. Nanjing Drum Tower Hospital, Nanjing, China.
- <sup>9</sup> Department of Endocrinology and Metabolism. The Second Affiliated Hospital of Soochow University, Suzhou, China.
- <sup>10</sup> Department of Endocrinology and Metabolism. The Second Xiangya Hospital of Central University, Changsha, China.
- <sup>11</sup> Department of Endocrinology and Metabolism. Jiangsu Province Hospital, Nanjing, China.
- <sup>12</sup> Department of Endocrinology and Metabolism. Shandong Provincial Hospital, Jinan, China.
- <sup>13</sup> Department of Endocrinology and Metabolism. Changhai Hospital, Shanghai, China.
- <sup>14</sup> Department of Endocrinology and Metabolism. The First Affiliated Hospital of Harbin Medical University, Harbin, China.
- <sup>15</sup> Department of Endocrinology and Metabolism. Shenzhen Second People's Hospital, the First Affiliated Hospital of Shenzhen University, Shenzhen, China.
- <sup>16</sup> Department of Endocrinology and Metabolism. The First Affiliated Hospital of Zhengzhou University, Zhengzhou, China.
- <sup>17</sup> Department of Obstetrics and Gynecology. Women's Hospital, Zhejiang University School of Medicine, Hangzhou, China.
- <sup>18</sup> Department of Endocrinology and Metabolism. Shenzhen People's Hospital, the Second Clinical Medical College of Jinan University, Shenzhen, China.
- <sup>19</sup> Department of Obstetrics and Gynecology. Shenzhen Maternity and Child Healthcare Hospital Affiliated to Southern Medical University, Shenzhen, China.
- <sup>20</sup> Department of Endocrinology and Metabolism. The Second Affiliated Hospital of Anhui Medical University, Hefei, China.

- <sup>21</sup> Department of Endocrinology and Metabolism. The First Affiliated Hospital of Anhui Medical University Hefei, China.
- <sup>22</sup> School of medicine, Nanchang University, Nanchang, China.
- <sup>23</sup> Department of Endocrinology and Metabolism. Xiangya Hospital of Central South University, Changsha, China.
- <sup>24</sup> Department of Epidemiology, College of Public Health, University of Iowa, City of Iowa, USA.
- <sup>25</sup> Lund University Diabetes Centre, Department of Clinical Sciences, Lund University, Malmö, Sweden
- <sup>26</sup> Faculty of Medicine, Imperial College London, London, UK
